# Supplementary material
Source: publisher figshare collection journal article supplement (https://gsapubs.figshare.com/ndownloader/files/29062260)
Supplement: Supplementary file 1 [file 29062260]

## Sheet: Sheet1
Table S4. Sr and Nd isotope geochemistry of granitic rocks
									U-Pb									model		model	CHUR
sample ID	N	E	Rb (ppm)	Sr (ppm)	Rb/Sr	87Rb/86Sr	87Sr/86Sr	2s	est. age	87Sr/86Sr(t)		Sm	Nd	Sm/Nd	147/144	143/144	2s	Nd(t)	eNd(0)	eNd(t)	t
92-194	3732109*	590145	85	706	0.120397	0.348909	0.7102	2e-05	74	0.709833						0.512018	8e-06	0.51195	-12.0943	-11.561	0.512543
92-195	3.73555e+06	584277	77	646	0.119195	0.345427	0.70987	7e-05	75	0.709502						0.511952	7e-06	0.511883	-13.3818	-12.8415	0.512541
92-199	3.7446e+06	583560	86	622	0.138264	0.400688	0.71005	1e-05	76	0.709617						0.511947	5e-06	0.511877	-13.4793	-12.9319	0.51254
93-219	3.74479e+06	616152	126	419	0.300716	0.871475	0.71201	2e-05	75	0.711081						0.511864	8e-06	0.511795	-15.0984	-14.5585	0.512541
00-340	3754300	576400	94	622	0.151125	0.437961	0.71248	1e-05	82	0.71197						0.511762	6e-06	0.511687	-17.0881	-16.4982	0.512532
95-256	3.74353e+06	579764	66	671	0.0983607	0.285049	0.70986	1e-05	79	0.70954						0.511978	4e-06	0.511906	-12.8746	-12.3054	0.512536
95-264	3.77116e+06	560524	150	258	0.581395	1.68488	0.7094	1e-05	78	0.707533						0.512056	8e-06	0.511985	-11.353	-10.7908	0.512538
92-193	3.72762e+06	595937	98	581	0.168675	0.488819	0.71097	1e-05	74	0.710456						0.511877	5e-06	0.511809	-14.8448	-14.312	0.512543
92-197	3.74347e+06	582676	97	619	0.156704	0.454129	0.71187	1e-05	75	0.711386						0.511881	7e-06	0.511812	-14.7668	-14.2268	0.512541
93-215	3.74342e+06	579803	150	258	0.581395	1.68488	0.71565	1e-05	81	0.713711						0.511764	8e-06	0.51169	-17.0491	-16.4663	0.512534
93-216	3.75473e+06	557581	90	466	0.193133	0.5597	0.71199	2e-05	82	0.711338						0.511903	8e-06	0.511828	-14.3376	-13.7471	0.512532
93-217	3.75484e+06	556563	167	410	0.407317	1.1804	0.71089	1e-05	74	0.709649						0.511991	5e-06	0.511923	-12.6288	-12.0956	0.512543
93-221	3772378	567714	89	714	0.12465	0.361235	0.71064	1e-05	79	0.710235						0.512017	8e-06	0.511945	-12.1138	-11.5445	0.512536
93-223	3771426	579448	234	139	1.68345	4.87865	0.71496	1e-05	74	0.709831						0.511905	8e-06	0.511837	-14.2986	-13.7657	0.512543
93-224	3775815	574145	179	244	0.733607	2.12599	0.71404	1e-05	81	0.711593						0.511885	8e-06	0.511811	-14.6887	-14.1055	0.512534
00-341	3765131	576304	219	258	0.848837	2.45993	0.71295	2e-05	76	0.710294						0.511807	7e-06	0.511737	-16.2103	-15.6634	0.51254
03-501	3764136	574547	244	199	1.22613	3.55333	0.71588	2e-05	77	0.711993						0.511778	5e-06	0.511707	-16.776	-16.222	0.512539
03-506	3756474	585428	120	484	0.247934	0.718512	0.71029	1e-05	80	0.709473						0.511942	7e-06	0.511869	-13.5768	-13.0006	0.512535
03-507	3759242	584633	148	109	1.3578	3.9349	0.71552	1e-05	80	0.711047						0.511909	7e-06	0.511836	-14.2206	-13.6445	0.512535
03-515	3761783	573858	91	631	0.144216	0.417937	0.70907	2e-05	77	0.708613						0.512077	7e-06	0.512006	-10.9434	-10.3883	0.512539
03-516	3759296	578570	196	77	2.54545	7.37673	0.71832	1e-05	77	0.71025						0.511929	1e-05	0.511858	-13.8304	-13.2759	0.512539
03-517	3754456	585796	132	346	0.381503	1.1056	0.71196	2e-05	80	0.710703						0.511863	1.8e-05	0.51179	-15.1179	-14.542	0.512535
04-528	3757256	584059	163	348	0.468391	1.3574	0.71118	1e-05	80	0.709637						0.511971	7e-06	0.511898	-13.0111	-12.4348	0.512535
04-529	3757815	581951	116	428	0.271028	0.785439	0.71044	2e-05	80	0.709547						0.511943	7e-06	0.51187	-13.5573	-12.9811	0.512535
95-258	3.74267e+06	577498	124	301	0.41196	1.19386	0.71105	2e-05	83	0.709642						0.511931	8e-06	0.511855	-13.7914	-13.1936	0.512531
95-261	3.76792e+06	545134	162	133	1.21805	3.52989	0.71692	2e-05	75	0.713159						0.511838	9e-06	0.511769	-15.6056	-15.0657	0.512541
95-262	3.77125e+06	560798	155	266	0.582707	1.68868	0.71479	1e-05	80	0.712871						0.511871	7e-06	0.511798	-14.9618	-14.3859	0.512535
95-263	3.77091e+06	560897	167	113	1.47788	4.28288	0.71799	1e-05	75	0.713426						0.511809	5e-06	0.51174	-16.1713	-15.6316	0.512541
92-198	3.7448e+06	586695	90	538	0.167286	0.484796	0.71171	2e-05	82	0.711145						0.511905	1e-05	0.51183	-14.2986	-13.7081	0.512532
93-222	3.77182e+06	579774					0.71069	2e-05	78	0.71069						0.511838	1.2e-05	0.511767	-15.6056	-15.0441	0.512538
530	3759461	572190	152	601	0.252912	0.730915	0.71109	1.1e-05	81	0.710249		3.218	22.245	0.144662	0.087445	0.511988	0.001	0.511942	-12.6795	-11.5523	0.512534
531	3759613	572206							81			6.097	29.942	0.203632	0.12309	0.511944	0.0012	0.511879	-13.5378	-12.7792	0.512534
534	3761145	570981							81			5.535	28.756	0.192483	0.116351	0.51196	0.0012	0.511898	-13.2257	-12.3974	0.512534
537	3761991	570845	96	679	0.141384	0.408601	0.710814	1e-05	81.1	0.710343		6.355	35.122	0.180937	0.109372	0.511966	0.0015	0.511908	-13.1087	-12.2071	0.512534
578	3749941	658192							76			5.081	30.659	0.16574	0.100185	0.51195	0.0009	0.5119	-13.4208	-12.4869	0.51254
756	3767264	664248	68	554.5	0.122633	0.354409	0.710989	1.1e-05	74	0.710616		4.783	25.061	0.190868	0.115373	0.511883	0.001	0.511827	-14.7277	-13.9621	0.512543
758	3787319	617682	132	696.7	0.189465	0.547553	0.71227	1.1e-05	76.1	0.711678		5.0987	31.556	0.161577	0.097668	0.511891	0.0009	0.511842	-14.5717	-13.6124	0.51254
760	3772416	633916	88	696.6	0.126328	0.365088	0.71012	1e-05	76.4	0.709724		4.589	27.527	0.166697	0.100765	0.512013	0.0009	0.511963	-12.1918	-11.2585	0.51254
761	3775613	636730	128	332.4	0.385078	1.11288	0.712031	9e-06	75	0.710845		1.262	6.409	0.196907	0.119025	0.511942	0.0009	0.511884	-13.5768	-12.8356	0.512541
773			87	611	0.14239	0.411506	0.710317	1e-05	76	0.709873		5.332	29.152	0.182905	0.110562	0.511996	0.001	0.511941	-12.5235	-11.69	0.51254
780			127	426	0.298122	0.861573	0.711703	1e-06	76	0.710773		4.183	26.0922	0.160316	0.096907	0.511958	0.0009	0.51191	-13.2647	-12.299	0.51254
* UTM Zone: S11, Datum, NAD27
